# Supplementary material for: In-cloud measurements highlight the role of aerosol hygroscopicity in clouddroplet formation
Source: Copernicus journal article supplement (doi:10.5194/acp-16-10385-2016), 2016-08-17
Supplement: Supplementary file 6 [file acp-16-10385-2016-supplement.zip]

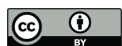

*Supplement of*

## **In-cloud measurements highlight the role of aerosol hygroscopicity in cloud droplet formation**

**Olli Väisänen et al.**

*Correspondence to:* Annele Virtanen (annele.virtanen@uef.fi)

- acp-16-10385-2016-supplement-title-page.pdf
- Supplement
  - Figure S1.pdf
  - Figure S2.pdf
  - Figure S3.pdf
  - Figure S4.pdf
  - Figure S5.pdf
  - Figure S6.pdf
  - Figure S7.pdf
  - Supplement.pdf

The copyright of individual parts of the supplement might differ from the CC-BY 3.0 licence.
