# Supplementary figures and images for: In-cloud measurements highlight the role of aerosol hygroscopicity in clouddroplet formation
Source: Copernicus journal article supplement (doi:10.5194/acp-16-10385-2016), 2016-08-17

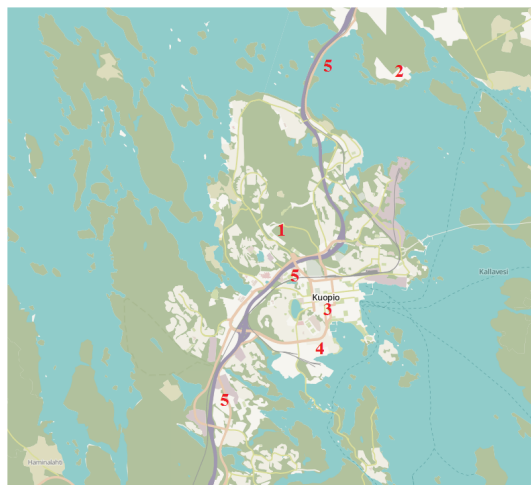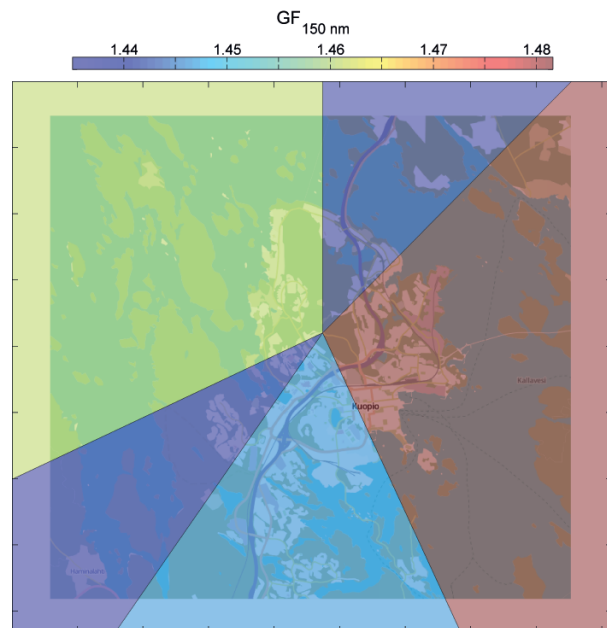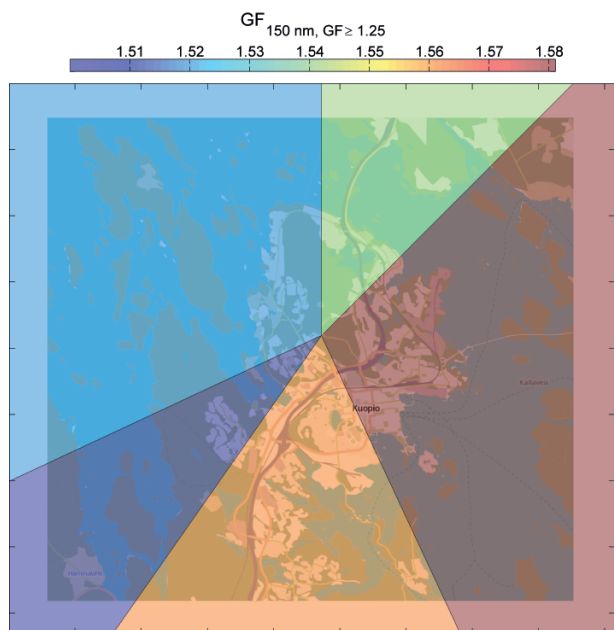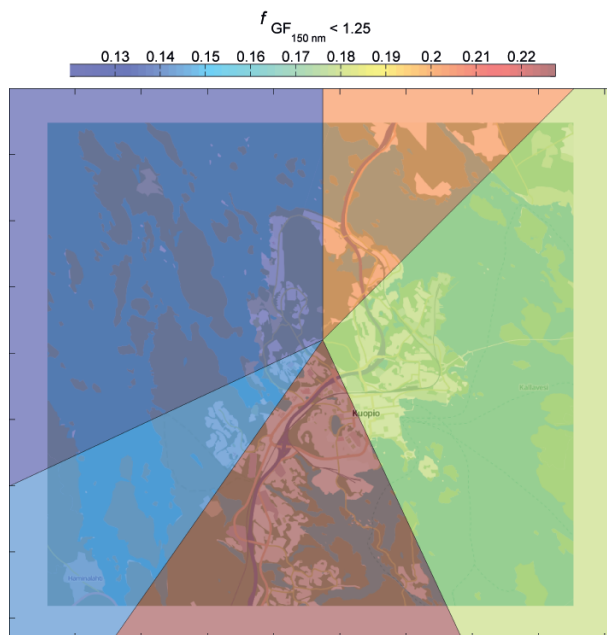

Supplement: Supplementary file 2 [file acp-16-10385-2016-supplement.zip]

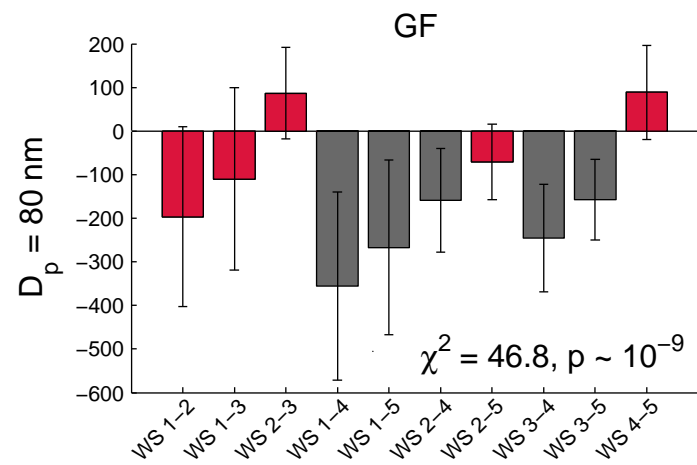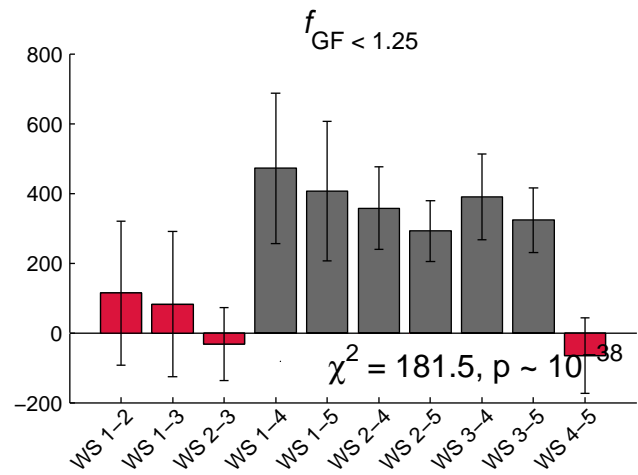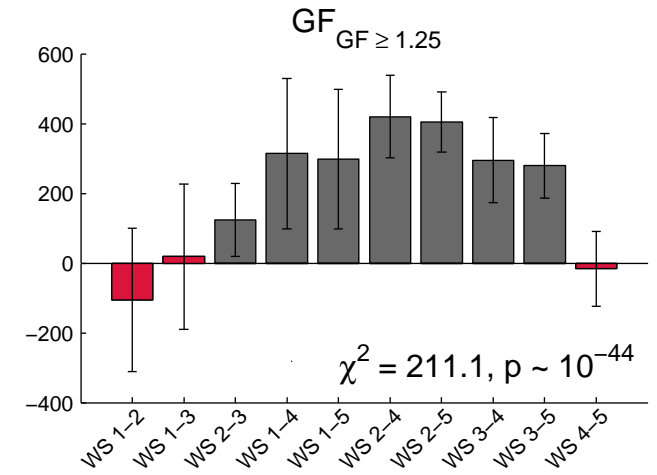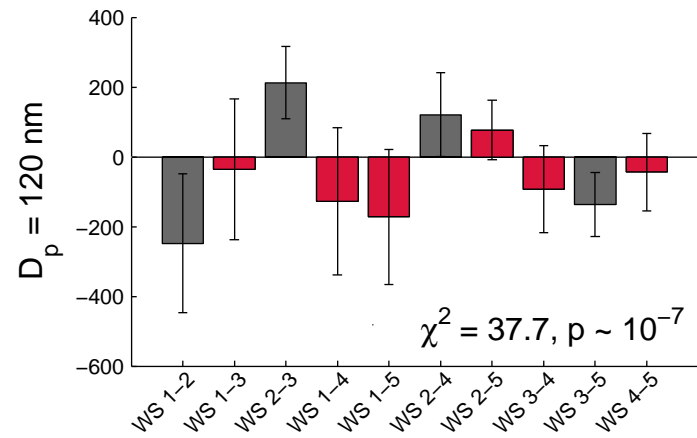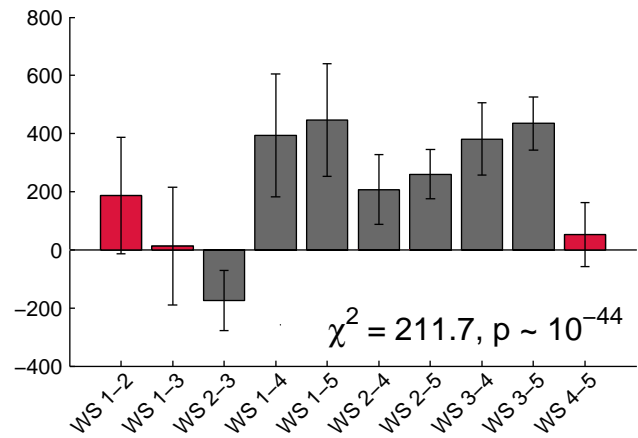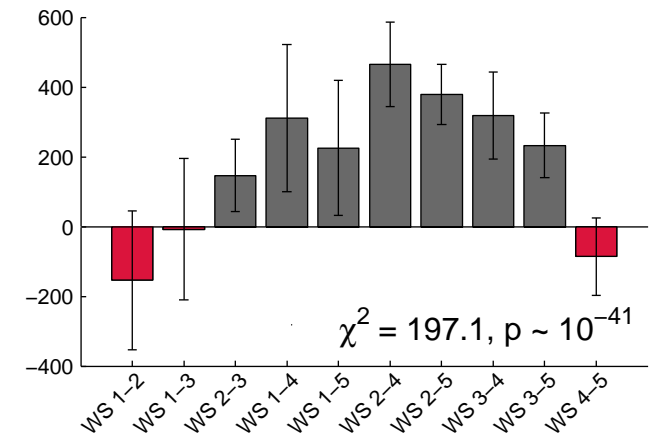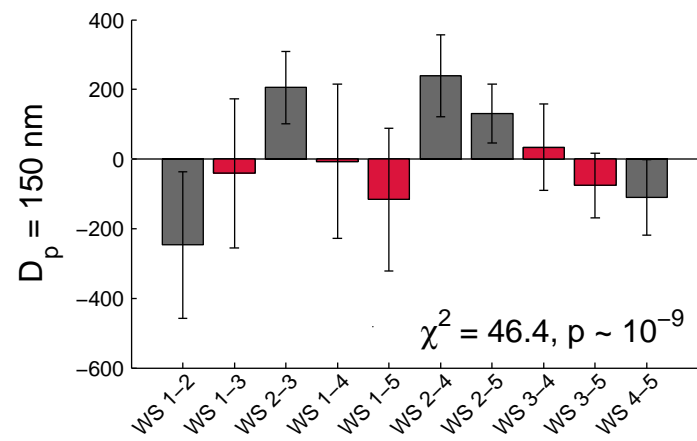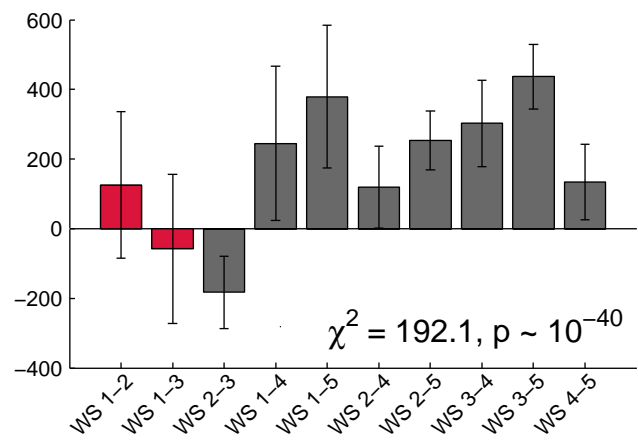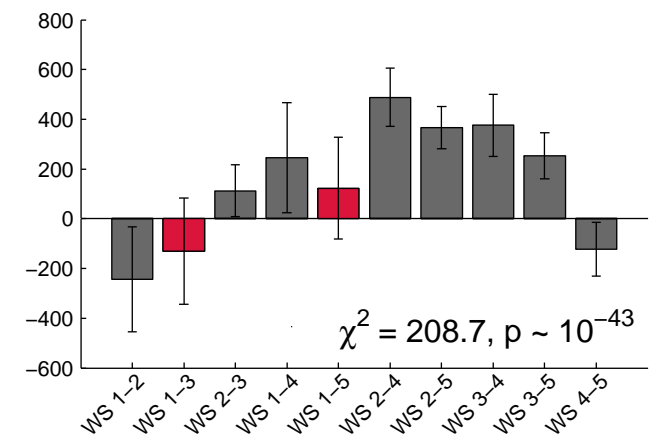

Supplement: Supplementary file 3 [file acp-16-10385-2016-supplement.zip]

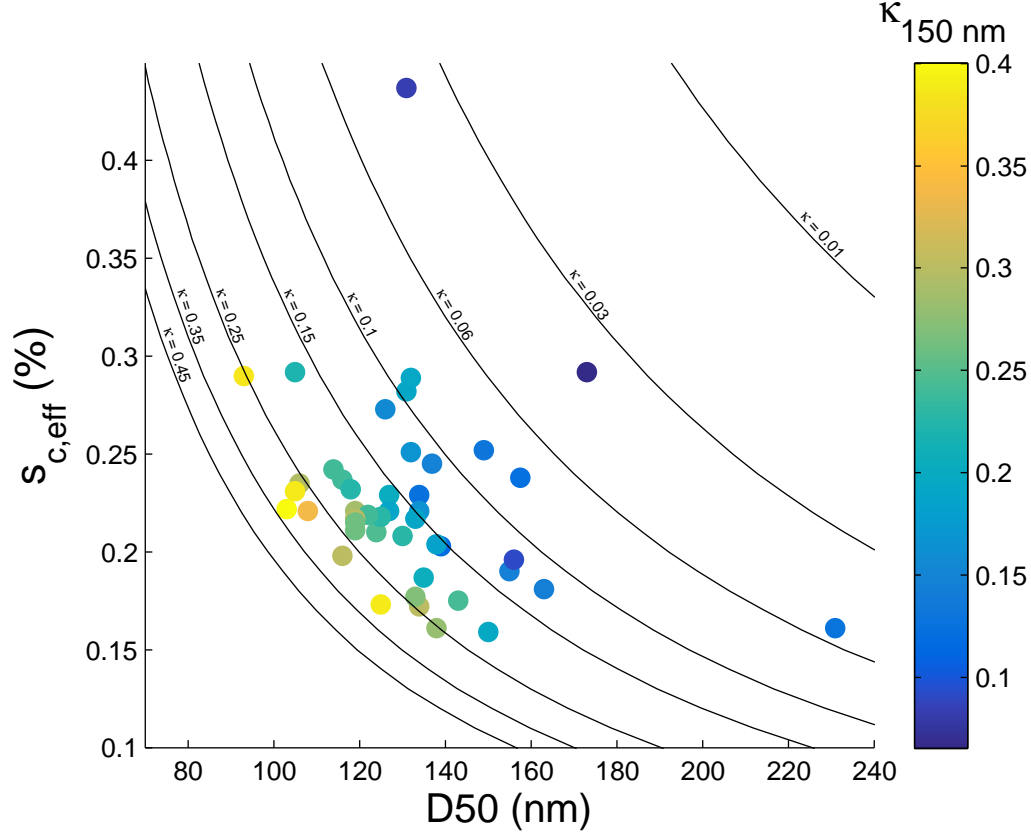

Supplement: Supplementary file 4 [file acp-16-10385-2016-supplement.zip]

GF<sub>80 nm</sub>

1.26 1.27 1.28 1.29 1.3 1.31

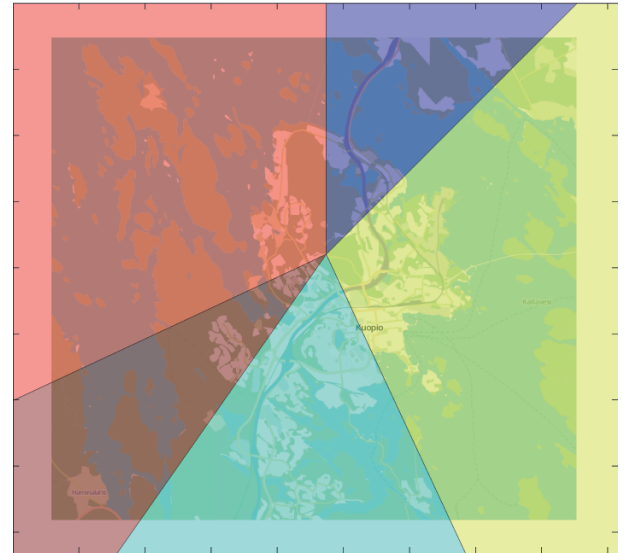

GF<sub>80 nm, GF ≥ 1.25</sub>

1.44 1.45 1.46 1.47 1.48 1.49 1.5 1.51

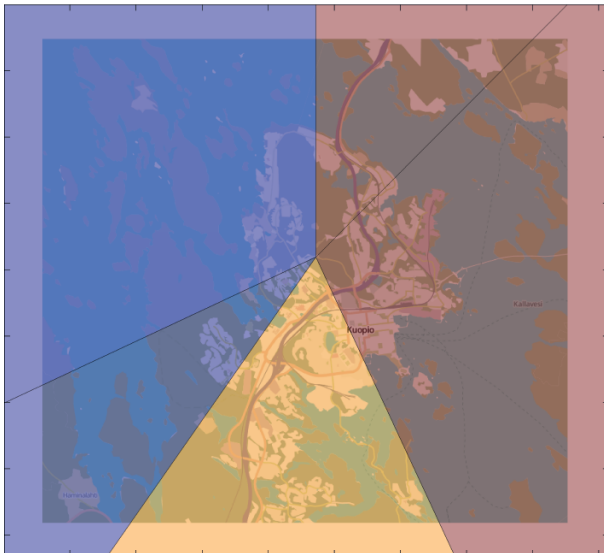

$f_{GF_{80 nm} < 1.25}$

0.38 0.4 0.42 0.44 0.46 0.48 0.5 0.52 0.54 0.56 0.58

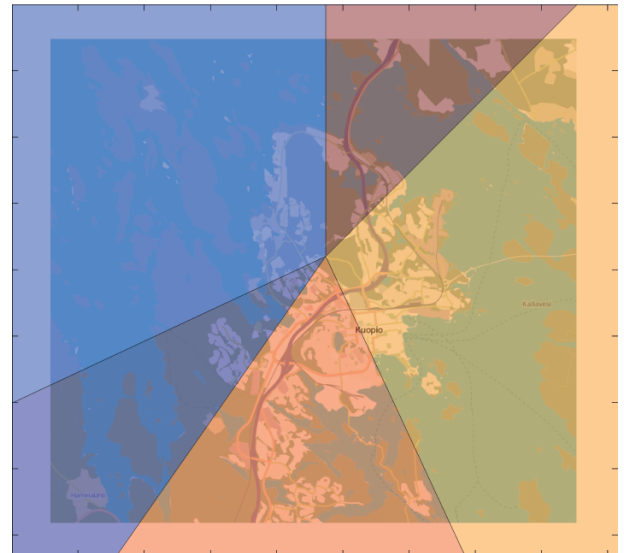

Supplement: Supplementary file 5 [file acp-16-10385-2016-supplement.zip]

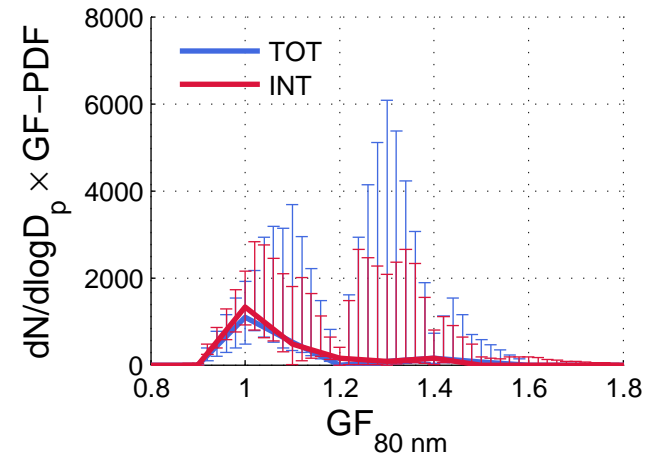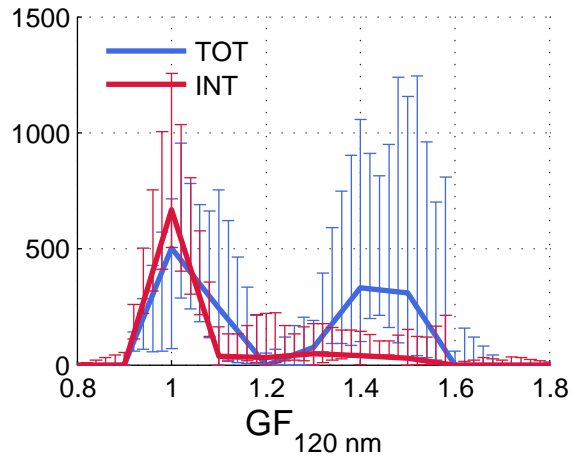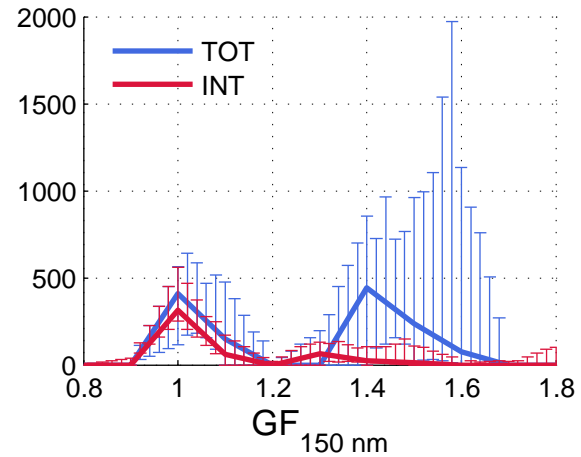

Supplement: Supplementary file 7 [file acp-16-10385-2016-supplement.zip]

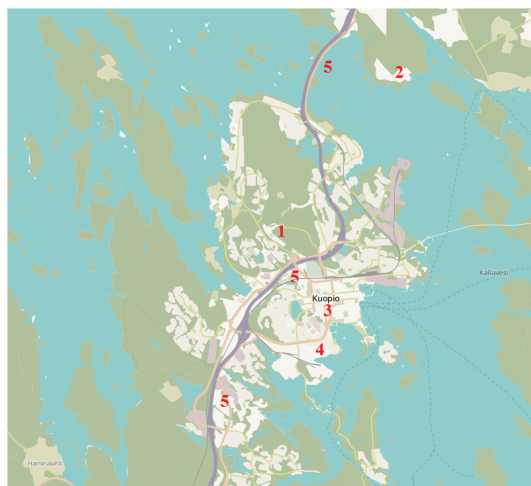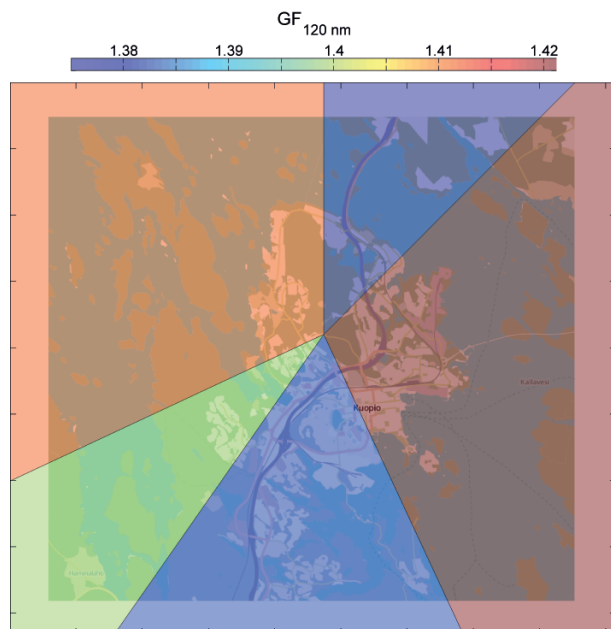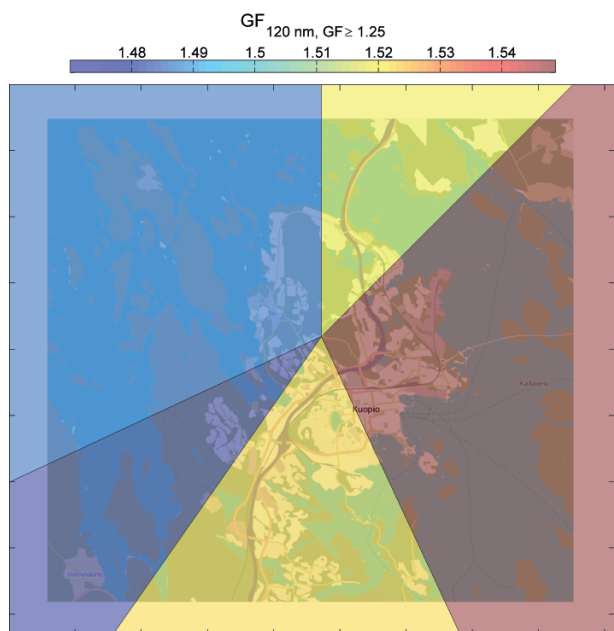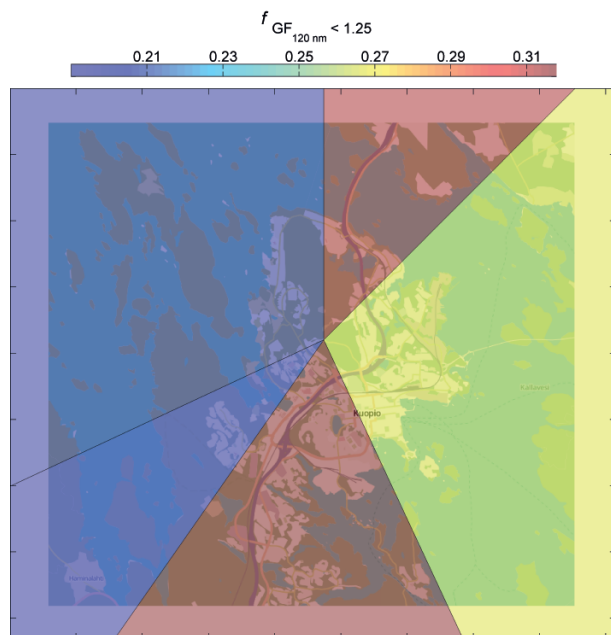

Supplement: Supplementary file 8 [file acp-16-10385-2016-supplement.zip]

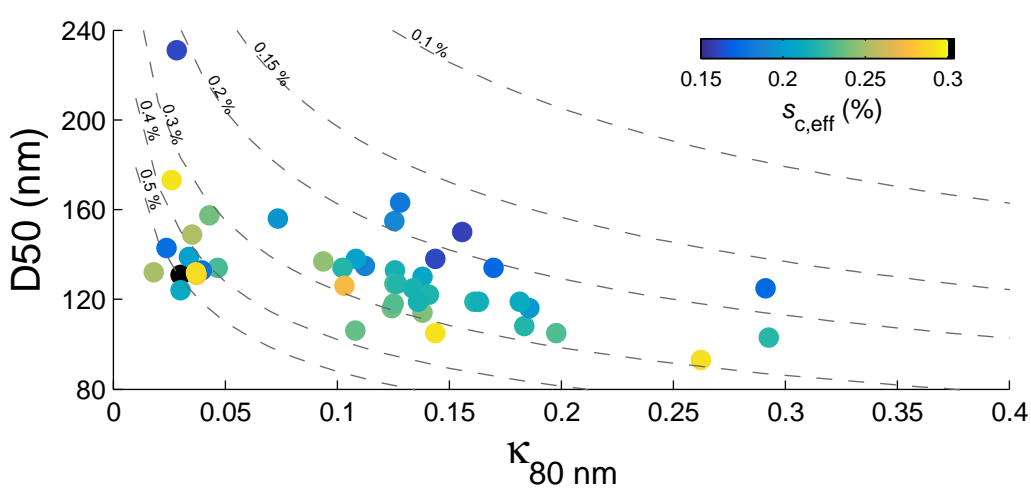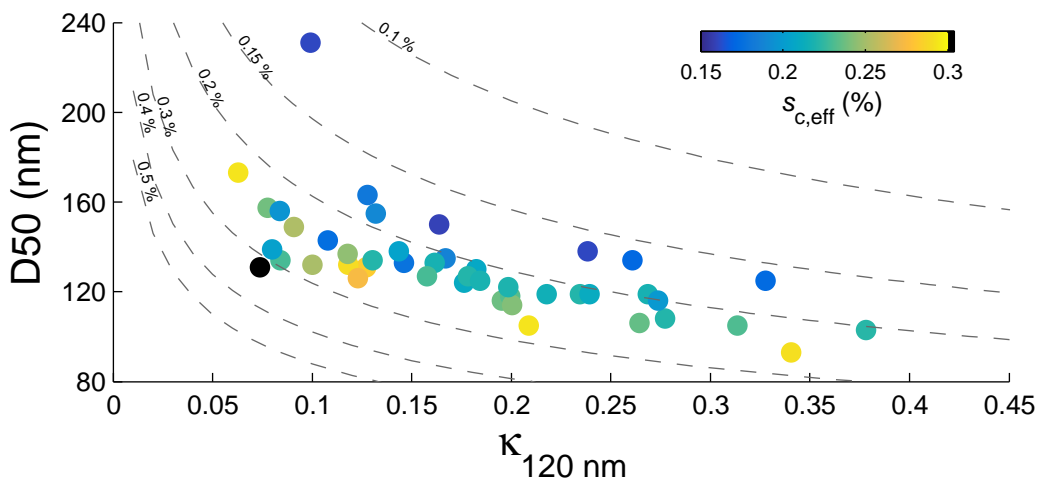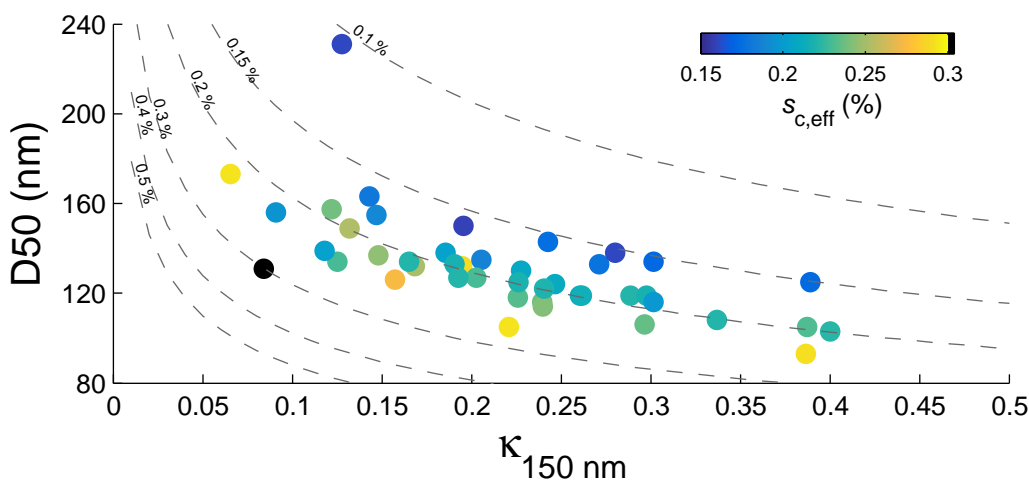

Supplement: Supplementary file 9 [file acp-16-10385-2016-supplement.zip]
